# Supplementary material
Source: PubMed Central journal article supplement (PMC4304581)
Supplement: CJP-2014-vol59-December-624-631-eTable-1.pdf [file CJP-2014-vol59-December-624-631-eTable-1.pdf]

Maxwell CJ, Stock K, Seitz D, et al. Persistence and adherence with dementia pharmacotherapy: relevance of patient, provider, and system factors. *Can J Psychiatry*. 2014;59(12):624–631.

**eTable 1. Summary of Predictors of Persistence and Adherence with Dementia Pharmacotherapy.**

| Characteristic                           | Studies on Persistence |                    |                             |                                                         |                                                                                                                                  | Studies on Adherence |                  |                 |                             |                                                                                                                                                                   |
|------------------------------------------|------------------------|--------------------|-----------------------------|---------------------------------------------------------|----------------------------------------------------------------------------------------------------------------------------------|----------------------|------------------|-----------------|-----------------------------|-------------------------------------------------------------------------------------------------------------------------------------------------------------------|
|                                          | Total # Studies        | Higher Persistence | Lower Persistence           | Non-Significant Association                             | Comments                                                                                                                         | Total # Studies      | Higher Adherence | Lower Adherence | Non-Significant Association | Comments                                                                                                                                                          |
| <b>Patient</b><br>Older age              | 20                     | 1<br>[44]          | 7<br>[34,38,39,45,46,50,53] | 12<br>[35,36,37,42,43,47,49,51,52,55,56,59]             | Most studies: older age = 75+ or 80+                                                                                             | 1                    | 1<br>[62]        | 0               | 0                           | Older age = 86+                                                                                                                                                   |
| Female sex                               | 19                     | 0                  | 3<br>[34,43,44]             | 16<br>[35,36,37,38,39,45,46,47,49,50,51,52,53,55,56,59] |                                                                                                                                  | 1                    | 0                | 1<br>[62]       | 0                           |                                                                                                                                                                   |
| Race (non-Caucasian)                     | 3                      | 0                  | 2<br>[51,59]                | 1<br>[37]                                               | Assessed ethnicity (European v. Other) [37]                                                                                      | 1                    | 0                | 1<br>[63]       | 0                           |                                                                                                                                                                   |
| Socioeconomic status / financial barrier | 5                      | 0                  | 2<br>[37,44]                | 3<br>[36,39,47]                                         | Paying for greater proportion of prescription costs [44]; Lower educational attainment [36,37,39,47]; & household income [36,47] | 2                    | 0                | 2<br>[62,64]    | 0                           | Higher cost medication (Higher formulary tier) [62]; High cost sharing v. low cost sharing for specific ChEI - unclear if within drug difference significant [64] |
| Caregiver in the home                    | 4                      | 0                  | 0                           | 4<br>[36,39,47,49]                                      |                                                                                                                                  | 0                    |                  |                 |                             |                                                                                                                                                                   |

| Greater Cognitive Impairment (disease severity) | 7               | 0                                                                                                         | 2<br>[44,49]                                                                                                               | 5<br>[36,37,39,42,47]                                                                                  | Decline in MMSE may better predict discontinuation [36,47]                                                    | 0               |                  |                 |                             |                                                                                                                                                                          |
|-------------------------------------------------|-----------------|-----------------------------------------------------------------------------------------------------------|----------------------------------------------------------------------------------------------------------------------------|--------------------------------------------------------------------------------------------------------|---------------------------------------------------------------------------------------------------------------|-----------------|------------------|-----------------|-----------------------------|--------------------------------------------------------------------------------------------------------------------------------------------------------------------------|
| <b>Table 1 continued.</b>                       |                 |                                                                                                           |                                                                                                                            |                                                                                                        |                                                                                                               |                 |                  |                 |                             |                                                                                                                                                                          |
| Characteristic                                  | Total # Studies | Higher Persistence                                                                                        | Lower Persistence                                                                                                          | Non-Significant Association                                                                            | Comments                                                                                                      | Total # Studies | Higher Adherence | Lower Adherence | Non-Significant Association | Comments                                                                                                                                                                 |
| Number of comorbid conditions                   | 10              | 2<br>[44,50]                                                                                              | 1<br>[43]                                                                                                                  | 7<br>[34,36,37,39,52,55,56]                                                                            | Chronic Disease Score [CDS] measure of comorbidity based on drug # & type from prescription claims [43,44,50] | 1               | 0                | 1<br>[62]       | 0                           |                                                                                                                                                                          |
| Pill burden                                     | 3               | 0                                                                                                         | 0                                                                                                                          | 3<br>[38,39,45]                                                                                        | Number of Medications [38,39,45]                                                                              | 2               | 2<br>[62,64]     | 0               | 1<br>[64Σ]                  | Number of medications [62,64]; High pill burden v. low for donepezil [64]; High v. low for rivastigmine patch [64Σ] – unclear if within drug difference significant [64] |
| Concurrent drug use                             | 7               | 2<br>[43,45]<br><br>Cardiac, Parkinson's, propulsives,* SSRIs,* BZDs (<6 months), antipsychotic drugs*(>6 | 3<br>[47,55,59]<br><br>CNS drugs [55]; Drugs that impair cognition (BZDs, anticholinergics, antipsychotics, opioids) [59]; | 5<br>[36,38,43,45,47]<br><br>Anticholinergics [43]; Antipsychotics [36,38,45,47]; Antidepressant [38]; |                                                                                                               | 0               |                  |                 |                             |                                                                                                                                                                          |

|                                             |                    | months) [43];<br>Anti-depressants<br>[45] | Anticholinergics<br>[47]        | Anticoagulant,<br>antiplatelet, anti-<br>diabetic,<br>hypolipemic,<br>antiasthmatic<br>drugs, NSAIDs [45] |                                                                                                                                      |                    |                     |                    |                                    |                                                                                     |
|---------------------------------------------|--------------------|-------------------------------------------|---------------------------------|-----------------------------------------------------------------------------------------------------------|--------------------------------------------------------------------------------------------------------------------------------------|--------------------|---------------------|--------------------|------------------------------------|-------------------------------------------------------------------------------------|
| <b>Table 1 continued.</b>                   |                    |                                           |                                 |                                                                                                           |                                                                                                                                      |                    |                     |                    |                                    |                                                                                     |
| Characteristic                              | Total #<br>Studies | Higher<br>Persistence                     | Lower<br>Persistence            | Non-Significant<br>Association                                                                            | Comments                                                                                                                             | Total #<br>Studies | Higher<br>Adherence | Lower<br>Adherence | Non-<br>Significant<br>Association | Comments                                                                            |
| <b>Drug</b><br>Donepezil v.<br>Rivastigmine | <b>14</b>          | <b>6</b><br>[34,35,38,<br>48,51,52]       | <b>0</b>                        | <b>8</b><br>[39,46,50,53,55,<br>56,57,58]                                                                 | Note: for all 3<br>comparisons,<br>unclear if<br>difference<br>significant in<br>adjusted<br>analyses [35]                           | <b>1</b>           | <b>0</b>            | <b>1</b> [61]      | <b>0</b>                           | Note:<br>adherence<br>high (94%) for<br>all 3 ChEIs[61]                             |
| Donepezil v.<br>Galantamine                 | <b>11</b>          | <b>2</b><br>[34,51]                       | <b>5</b><br>[35,38,46,48<br>50] | <b>4</b><br>[39,52,53,58]                                                                                 |                                                                                                                                      | <b>1</b>           | <b>0</b>            | <b>0</b>           | <b>1</b> [61]                      |                                                                                     |
| Galantamine v.<br>Rivastigmine              | <b>12</b>          | <b>4</b><br>[35,38,43,<br>48]             | <b>0</b>                        | <b>8</b><br>[34,39,46,50,51,<br>52,53,58]                                                                 |                                                                                                                                      | <b>1</b>           | <b>0</b>            | <b>1</b> [61]      | <b>0</b>                           | Difference<br>may not be<br>statistically<br>significant -<br>not specified<br>[61] |
| Ineffective<br>dose                         | <b>3</b>           | <b>0</b>                                  | <b>2</b><br>[36,43]             | <b>1</b><br>[47]                                                                                          | <5mg/day<br>donepezil;<br><6mg/day (or<br><9mg/day [43])<br>rivastigmine;<br><16mg/day<br>galantamine                                | <b>0</b>           |                     |                    |                                    |                                                                                     |
| Ease of Use                                 | <b>2</b>           | <b>2</b><br>[38,48]                       | <b>0</b>                        | <b>0</b>                                                                                                  | Galantamine ER<br>(1/day) v.<br>Galantamine IR<br>(2/day) [48];<br>Once daily<br>donepezil v.<br>twice daily<br>rivastigmine<br>[38] | <b>1</b>           | <b>1</b><br>[64]    | <b>0</b>           | <b>0</b>                           | Rivastigmine<br>transdermal<br>patch v. oral<br>medication                          |

|           |   |              |   |   |                                                                         |   |  |  |  |  |
|-----------|---|--------------|---|---|-------------------------------------------------------------------------|---|--|--|--|--|
| Memantine | 2 | 2<br>[35,38] | 0 | 0 | Memantine +<br>ChEI v. ChEI<br>alone [38];<br>Memantine v.<br>ChEI [35] | 0 |  |  |  |  |
|-----------|---|--------------|---|---|-------------------------------------------------------------------------|---|--|--|--|--|

**Table 1 continued.**

| Characteristic                                | Total #<br>Studies | Higher<br>Persistence     | Lower<br>Persistence | Non-Significant<br>Association                 | Comments                                                                                                                                                                                                                                                  | Total #<br>Studies | Higher<br>Adherence | Lower<br>Adherence | Non-<br>Significant<br>Association | Comments |
|-----------------------------------------------|--------------------|---------------------------|----------------------|------------------------------------------------|-----------------------------------------------------------------------------------------------------------------------------------------------------------------------------------------------------------------------------------------------------------|--------------------|---------------------|--------------------|------------------------------------|----------|
| <b>Health System /<br/>Setting</b>            |                    |                           |                      |                                                |                                                                                                                                                                                                                                                           |                    |                     |                    |                                    |          |
| Frequent physician<br>visits                  | 3                  | 2<br>[44,55]              | 0                    | 1<br>[50]                                      |                                                                                                                                                                                                                                                           | 0                  |                     |                    |                                    |          |
| Hospitalization                               | 5                  | 2<br>[50,55]<br>-LOS [50] | 3<br>[36,42,47]      | 1<br>[50]<br>-#hospitalizations<br>& ER visits | AD-related<br>hospitalization<br>[36]; Any<br>hospitalization<br>[55,47]; Hospice<br>admission [42];<br>Hospitalization<br>in year prior to<br>index ChEI<br>prescription<br>[50]<br>Hospitalization<br>prior to ChEI<br>discontinuation<br>[36,42,47,55] | 0                  |                     |                    |                                    |          |
| LTC v. community                              | 5                  | 3<br>[46,54,59]           | 0                    | 2<br>[44,51]                                   |                                                                                                                                                                                                                                                           | 0                  |                     |                    |                                    |          |
| Rural Setting                                 | 1                  | 0                         | 0                    | 1<br>[44]                                      |                                                                                                                                                                                                                                                           | 0                  |                     |                    |                                    |          |
| <b>Provider /<br/>Prescriber</b>              |                    |                           |                      |                                                |                                                                                                                                                                                                                                                           |                    |                     |                    |                                    |          |
| Specialty:<br>GP v. specialist                | 2                  | 0                         | 1<br>[50]            | 1<br>[45]                                      |                                                                                                                                                                                                                                                           | 0                  |                     |                    |                                    |          |
| Specialty:<br>Psychiatrist v.<br>Geriatrician | 2                  | 0                         | 1<br>[36]            | 1<br>[45]                                      |                                                                                                                                                                                                                                                           | 0                  |                     |                    |                                    |          |

|                                              |          |                  |          |                  |  |          |  |  |  |  |
|----------------------------------------------|----------|------------------|----------|------------------|--|----------|--|--|--|--|
| Specialty:<br>Neurologist v.<br>Geriatrician | <b>2</b> | <b>1</b><br>[36] | <b>0</b> | <b>1</b><br>[45] |  | <b>0</b> |  |  |  |  |
|----------------------------------------------|----------|------------------|----------|------------------|--|----------|--|--|--|--|
